# Supplementary material for: Catalytic activity of shaped platinum nanoparticles for hydrogenation: a kinetic study
Source: Royal Society of Chemistry journal article supplement (doi:10.1039/c4cy00580e), 2014-06-06
Supplement: c4cy00580e1.pdf [file c4cy00580e1.pdf]

## **Catalytic activity of shaped platinum nanoparticles for hydrogenation: a kinetic study**

Xiaodi Li, Guozhu Li,\* Wanting Zang, Li Wang, Xiangwen Zhang

Key Laboratory of Green Chemical Technology of Ministry of Education,  
Collaborative Innovation Center of Chemical Science and Engineering (Tianjin),  
School of Chemical Engineering and Technology, Tianjin University, Tianjin 300072,  
China

**Table S1.** L-H models of the different controlling mechanism for 4-nitrophenol (4-NP)

reduction by hydrogen

| Model No.                                                                     | Rate model                                                                        |
|-------------------------------------------------------------------------------|-----------------------------------------------------------------------------------|
| Single site-molecularly adsorbed 4-NP and molecularly adsorbed H <sub>2</sub> |                                                                                   |
| 1                                                                             | $r_1 = \frac{k_1 C_A}{(1 + K_B^{1/3} C_B)}$                                       |
| 2                                                                             | $r_1 = \frac{k_1 C_B^3}{(1 + K_A C_A)^3}$                                         |
| 3                                                                             | $r_1 = \frac{k_1 K_A K_B C_A C_B^3}{(1 + K_A C_A + K_B^{1/3} C_B)^4}$             |
| Single site-molecularly adsorbed 4-NP and atomically adsorbed H <sub>2</sub>  |                                                                                   |
| 4                                                                             | $r_1 = \frac{k_1 C_B^3}{(1 + K_B^{1/6} C_B^{1/2})}$                               |
| 5                                                                             | $r_1 = \frac{k_1 C_B^3}{(1 + K_A C_A)^6}$                                         |
| 6                                                                             | $r_1 = \frac{k_1 K_A K_B C_A C_B^3}{(1 + K_A C_A + K_B^{1/6} C_B^{1/2})^7}$       |
| Single site-molecularly adsorbed 4-NP and H <sub>2</sub> in the liquid-phase  |                                                                                   |
| 7                                                                             | $r_1 = \frac{k_1 K_A C_A C_B^3}{(1 + K_A C_A)^4}$                                 |
| Dual site-molecularly adsorbed 4-NP and molecularly adsorbed H <sub>2</sub>   |                                                                                   |
| 8                                                                             | $r_1 = \frac{k_1 K_A K_B C_A C_B^3}{(1 + K_A C_A)(1 + K_B^{1/3} C_B)^3}$          |
| Dual site-molecularly adsorbed 4-NP and atomically adsorbed H <sub>2</sub>    |                                                                                   |
| 9                                                                             | $r_1 = \frac{k_1 K_A K_B^3 C_A C_B^3}{(1 + K_A C_A) (1 + K_B^{1/2} C_B^{1/2})^6}$ |

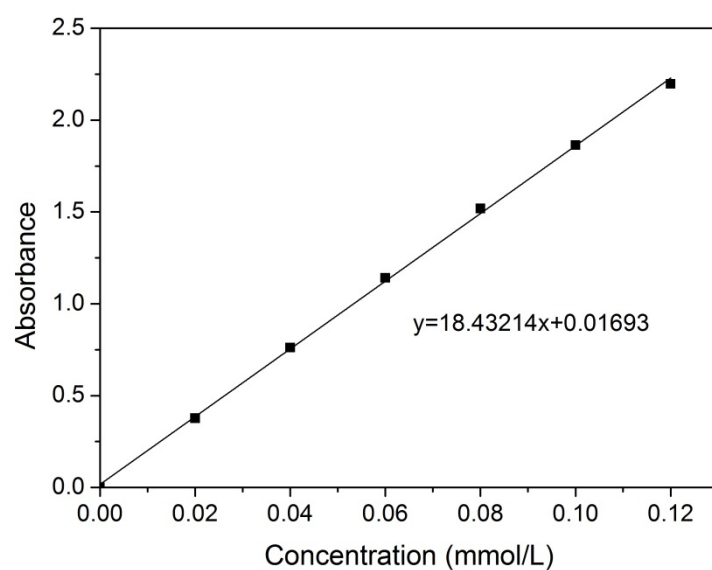

**Figure S1.** The standard curve of the concentration of 4-nitrophenol versus its absorbance at 400 nm

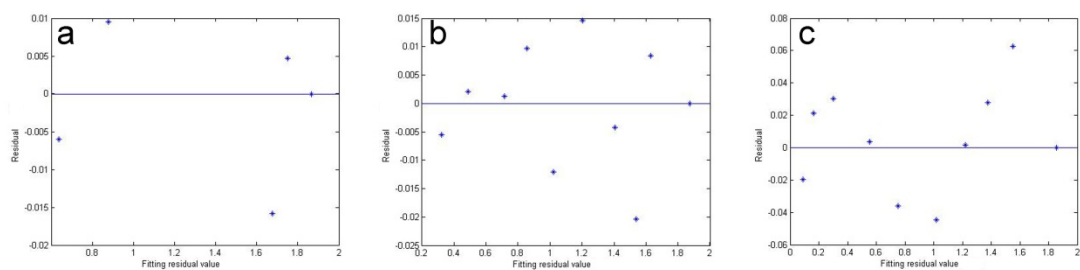

**Figure S2.** Residual versus 4-nitrophenol absorbance of the fitting of L-H model for cubic Pt(3-HB) NPs at 25 °C (a), 40 °C (b), and 70 °C (c) under 0.4 MPa.

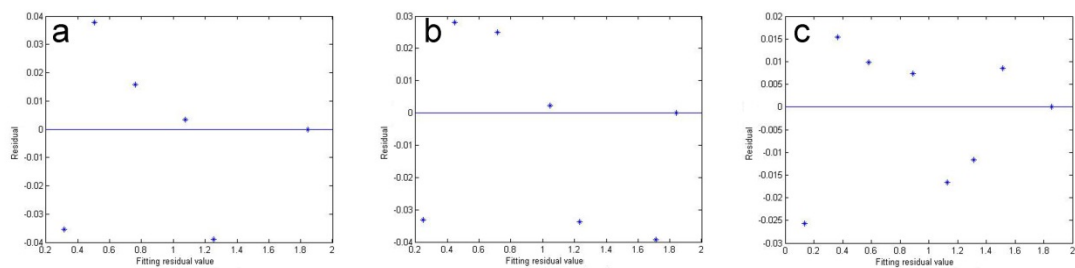

**Figure S3.** Residual versus 4-nitrophenol absorbance of the fitting of L-H model for *pseudo*-tetrahedral Pt(TA) NPs at 25 °C (a), 40 °C (b), and 70 °C (c) under 0.4 MPa.

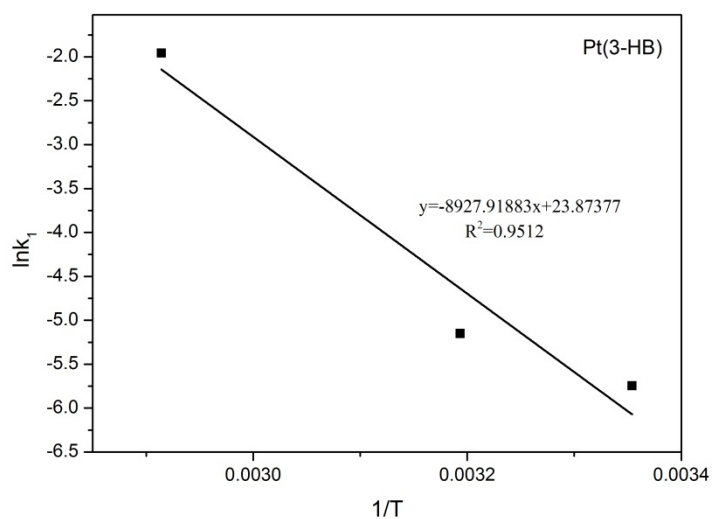

**Figure S4.** Arrhenius plotting for 4-nitrophenol hydrogenation over cubic Pt(3-HB) NPs under 0.4 MPa

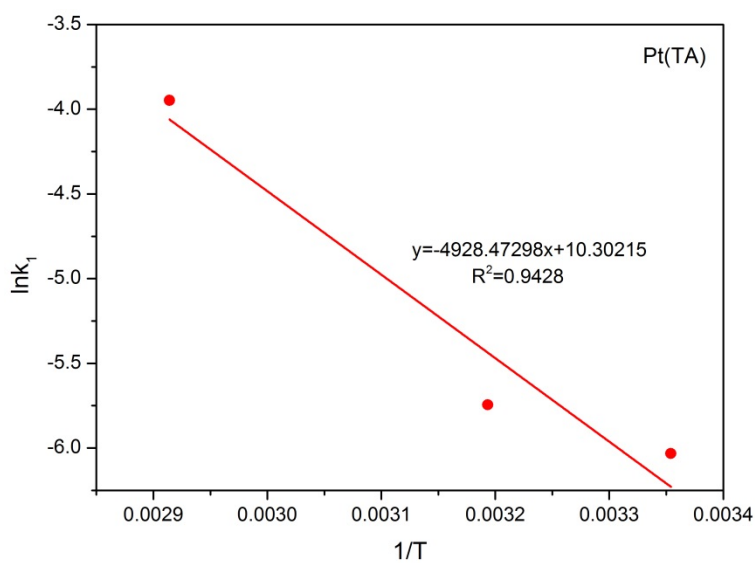

**Figure S5.** Arrhenius plotting for 4-nitrophenol hydrogenation over *pseudo*-tetrahedral Pt(TA) NPs under 0.4 MPa

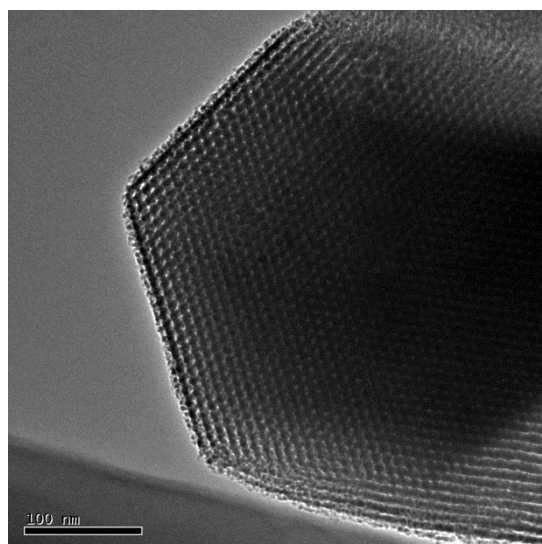

**Figure S6.** TEM image of the initial SBA-15.

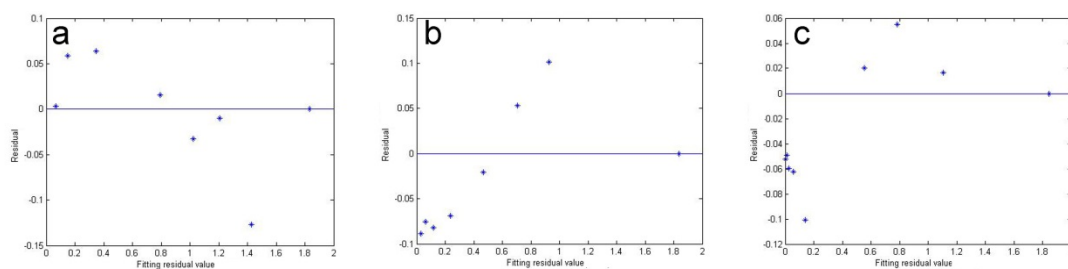

**Figure S7.** Residual versus 4-nitrophenol absorbance of the fitting of L-H model for Pt(3-HB)/SBA-15 at 26 °C (a), 40 °C (b), and 55 °C (c) under 0.4 MPa.

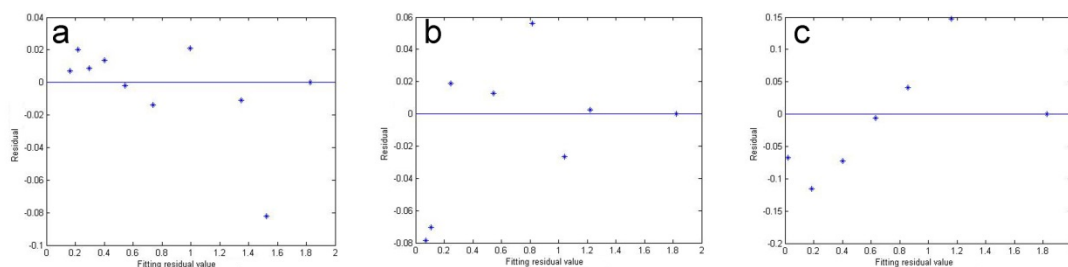

**Figure S8.** Residual versus 4-nitrophenol absorbance of the fitting of L-H model for Pt(TA)/SBA-15 at 27 °C (a), 40 °C (b), and 55 °C (c) under 0.4 MPa.

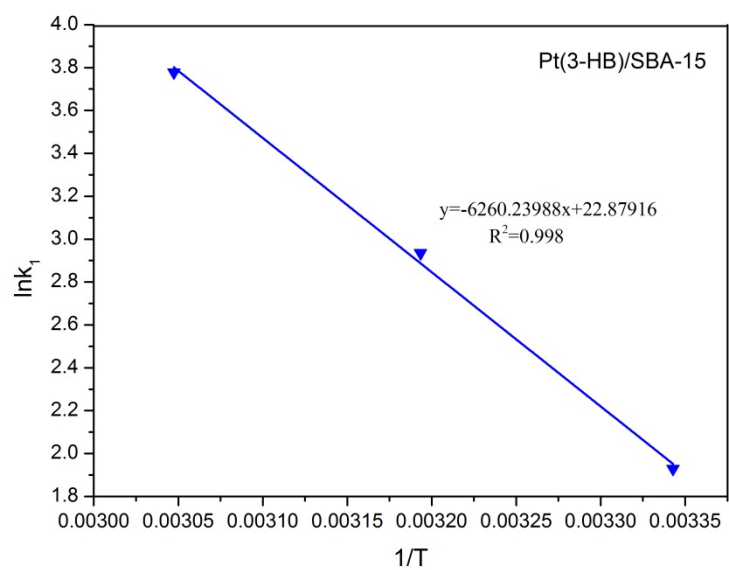

**Figure S9.** Arrhenius plotting for 4-nitrophenol hydrogenation over Pt(3-HB)/SBA-15 under 0.4 MPa

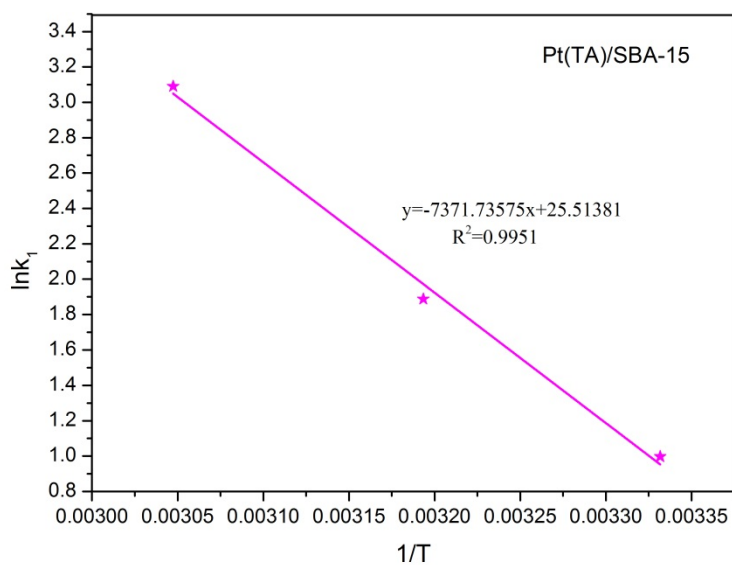

**Figure S10.** Arrhenius plotting for 4-nitrophenol hydrogenation over Pt(TA)/SBA-15 under 0.4 MPa
